# Supplementary material
Source: PubMed Central journal article supplement (PMC3876761)
Supplement: peds.2013-0570_peds.2013-0570SupplementaryData.pdf [file peds.2013-0570_peds.2013-0570SupplementaryData.pdf]

## Supplemental Information

**SUPPLEMENTAL TABLE 4** Demographic Characteristics Overall and by SSB

| Variable              | 2 y                                                              |                             |        | 4 y                                                              |                             |        | 5 y                                                              |                             |        |
|-----------------------|------------------------------------------------------------------|-----------------------------|--------|------------------------------------------------------------------|-----------------------------|--------|------------------------------------------------------------------|-----------------------------|--------|
|                       | Total N <sup>a</sup><br>(weighted % <sup>b</sup><br>of category) | Daily SSB<br>Consumption, % |        | Total N <sup>a</sup><br>(weighted % <sup>b</sup><br>of category) | Daily SSB<br>Consumption, % |        | Total N <sup>a</sup><br>(weighted % <sup>b</sup><br>of category) | Daily SSB<br>Consumption, % |        |
|                       |                                                                  | <1                          | ≥1     |                                                                  | <1                          | ≥1     |                                                                  | <1                          | ≥1     |
| <b>Gender</b>         |                                                                  |                             |        |                                                                  |                             |        |                                                                  |                             |        |
| Male                  | 3800 (51.1)                                                      | 90.6                        | 9.4    | 4534 (50.9)                                                      | 86.3                        | 13.7   | 3556 (50.6)                                                      | 87.2                        | 12.8   |
| Female                | 3300 (48.9)                                                      | 90.9                        | 9.1    | 4385 (49.1)                                                      | 87.8                        | 12.1   | 3455 (49.4)                                                      | 89.7                        | 10.3   |
| <i>P</i> <sup>c</sup> |                                                                  |                             | .31    |                                                                  |                             | .50    |                                                                  |                             | .05    |
| <b>Race/ethnicity</b> |                                                                  |                             |        |                                                                  |                             |        |                                                                  |                             |        |
| White                 | 2950 (42.8)                                                      | 92.6                        | 7.4    | 3882 (43.8)                                                      | 88.6                        | 11.3   | 2854 (41.5)                                                      | 91.0                        | 9.0    |
| Black                 | 1100 (15.0)                                                      | 90.1                        | 9.9    | 1348 (15.4)                                                      | 80.0                        | 20.0   | 1081 (15.8)                                                      | 80.3                        | 19.7   |
| Hispanic              | 1500 (20.6)                                                      | 87.4                        | 12.6   | 1759 (19.7)                                                      | 85.9                        | 14.1   | 1407 (20.0)                                                      | 87.3                        | 12.7   |
| Asian                 | 750 (10.3)                                                       | 93.5                        | 6.5    | 901 (10.0)                                                       | 93.8                        | 6.2    | 784 (10.7)                                                       | 95.1                        | 4.9    |
| Other                 | 200 (11.3)                                                       | 88.6                        | 11.4   | 1014 (11.1)                                                      | 86.8                        | 13.2   | 943 (12.0)                                                       | 86.5                        | 13.4   |
| <i>P</i> <sup>c</sup> |                                                                  |                             | <.0001 |                                                                  |                             | <.0001 |                                                                  |                             | <.0001 |
| <b>SES</b>            |                                                                  |                             |        |                                                                  |                             |        |                                                                  |                             |        |
| High                  | 1600 (23.3)                                                      | 96.2                        | 3.8    | 2069 (23.2)                                                      | 95.9                        | 4.1    | 1656 (23.9)                                                      | 96.4                        | 3.6    |
| Medium High           | 1350 (20.2)                                                      | 93.8                        | 6.2    | 1766 (19.8)                                                      | 90.4                        | 9.6    | 1382 (19.9)                                                      | 92.8                        | 7.2    |
| Medium                | 1350 (19.7)                                                      | 91.5                        | 8.5    | 1762 (19.9)                                                      | 88.2                        | 11.8   | 1364 (19.5)                                                      | 89.0                        | 11.0   |
| Medium Low            | 1300 (19.1)                                                      | 87.0                        | 13.0   | 1699 (19.0)                                                      | 80.9                        | 19.1   | 1317 (19.0)                                                      | 83.2                        | 16.8   |
| Low                   | 1200 (17.7)                                                      | 84.2                        | 15.8   | 1623 (18.1)                                                      | 77.3                        | 22.7   | 1273 (18.4)                                                      | 78.1                        | 21.9   |
| <i>P</i> <sup>c</sup> |                                                                  |                             | <.0001 |                                                                  |                             | <.0001 |                                                                  |                             | <.0001 |

<sup>a</sup> All Ns are rounded to the nearest 50 in compliance with NCES rules.

<sup>b</sup> All percents are weighted to population.

<sup>c</sup>  $\chi^2$  test comparing rates of SSB consumption between groups.
